# Supplementary material for: Potential Antioxidant and Anti-Inflammatory Properties of Serum from Healthy Adolescents with Optimal Mediterranean Diet Adherence: Findings from DIMENU Cross-Sectional Study
Source: MDPI journal article supplement (doi:10.3390/antiox10081172), 2021-07-23
Supplement: s1 [file s1]

**Figure S1:** Examples of photographs from the photo atlas showing portion sizes and the energy intake.

| FOOD    | WEIGHT/ENERGY                                                                                         |                                                                                                       |                                                                                                       | CUP                                                                                                                                                                                                                                           |
|---------|-------------------------------------------------------------------------------------------------------|-------------------------------------------------------------------------------------------------------|-------------------------------------------------------------------------------------------------------|-----------------------------------------------------------------------------------------------------------------------------------------------------------------------------------------------------------------------------------------------|
| Pasta   | <br>60g/ 270 Kcal    | <br>80g/ 350 Kcal    | <br>120g/ 540 Kcal   | <br>Small                                                                                                                                                  |
|         | <br>60g/ 80 Kcal     | <br>120g/ 160 Kcal   | <br>240g/ 320 Kcal   | <br>Medium                                                                                                                                                 |
|         | <br>100g/ 115 Kcal   | <br>150g/ 180 Kcal   | <br>200g/ 230 Kcal   | <br>Large                                                                                                                                                  |
| Fruit   | <br>100g/ 24 Kcal    | <br>180g/ 48 Kcal    | <br>220g/ 68 Kcal    | <b>SPOON (5 g)</b><br><br>Sugar: 20 Kcal<br><br><br>Oil: 45 Kcal<br> |
|         | <br>30g/ 86 Kcal     | <br>60 g/ 172 Kcal   | <br>100g/ 288 Kcal   |                                                                                                                                                                                                                                               |
|         | <br>100g/ 160 Kcal | <br>150g/ 240 Kcal | <br>200g/ 320 Kcal |                                                                                                                                                                                                                                               |
| Legumes | <br>50g/ 46 Kcal   | <br>80g/ 72 Kcal   | <br>120g/ 106 Kcal |                                                                                                                                                                                                                                               |

**Table S1: Energy and nutrients intake from 24-hour recall in total sample.**

| <b>Primary energy sources</b> | <b>Total Sample</b>      |
|-------------------------------|--------------------------|
| Total Energy (kcal)           | 1687,04 ± 475,09         |
| Total Fat (g)                 | 77,25 ± 26,65            |
| Total Carbohydrate (g)        | 169,42 ± 71,21           |
| Total protein (g)             | 72,96 ± 28,27            |
| Animal Protein (g)            | 43,78 ± 25,91            |
| Vegetable Protein (g)         | 22,75 ± 10,79            |
| <b>Fats</b>                   |                          |
| SFA (g)                       | 20,01 ± 9,68             |
| MUFA (g)                      | 39,21 ± 15,44            |
| PUFA (g)                      | 8,87 ± 4,81              |
| Vegetable Fats (g)            | 44,00 ± 16,83            |
| Animal Fats (g)               | 26,66 ± 22,68            |
| Omega-3 Fatty Acids (g)       | 1,14 ± 0,79              |
| Omega-6 Fatty Acids (g)       | 7,39 ± 4,05              |
| EPA (g)                       | 0,09 ± 0,173             |
| DHA (g)                       | 0,16 ± 0,50              |
| PUFA:SFA ratio                | 0,50 ± 0,29              |
| Cholesterol (mg)              | 224,82 ± 169,00          |
| <b>Carbohydrates</b>          |                          |
| Starch (g)                    | 169,42 ± 71,67           |
| Soluble sugars (g)            | 52,18 ± 28,79            |
| Glycemic Index                | 71,39 ± 20,18            |
| Glycemic Load                 | 83,72 ± 51,63            |
| <b>Fibers</b>                 |                          |
| Total dietary fiber           | 14,25 ± 5,76             |
| Soluble dietary fiber         | 2,22 ± 1,45              |
| Insoluble dietary fiber       | 6,70 ± 4,58              |
| <b>Vitamins</b>               |                          |
| Vitamin A eq. Retinol         | 998,38 ± 738,32          |
| Vitamin B1 (mg)               | 0,95 ± 0,85              |
| Vitamin B2 (mg)               | 1,13 ± 0,49              |
| Vitamin B3 (mg)               | 16,05 ± 7,96             |
| Vitamin B5 (mg)               | 2,56 ± 1,72              |
| Vitamin B6 (mg)               | 1,69 ± 0,71              |
| Vitamin B8 (µg)               | 13,82 ± 11,43            |
| Folic Acid (µg)               | 225,69 ± 105,94          |
| Vitamin B12 (µg)              | 4,21 ± 8,43              |
| Vitamin C (mg)                | 88,25 ± 62,73            |
| Vitamin K (µg)                | 2,79 ± 5,51              |
| Vitamin D (µg)                | 2,05 ± 2,89              |
| Vitamin E (mg)                | 12,32 ± 3,66             |
| <b>Total ORAC (µmol TE)</b>   | <b>1599,86 ± 1625,11</b> |
| <b>Minerals</b>               |                          |
| Calcium (mg)                  | 534,45 ± 304,78          |
| Phosphorus (mg)               | 657.19 ± 184.33          |

|                  |                       |
|------------------|-----------------------|
| Iodium (µg)      | 64,93 ± 65,77         |
| Sodium(mg)       | 1291,45 ± 1082,36     |
| Iron (mg)        | 8,65 ± 4,24           |
| Magnesium (mg)   | 191,69 ± 107,16       |
| Selenium (µg)    | 37,39 ± 34,35         |
| Potassium (mg)   | 2408,98 ± 852,20      |
| Zinc (mg)        | 6.47 ± 0.08           |
| <b>Water (g)</b> | <b>660.71 ± 50.13</b> |

SFA, saturated fatty acid; MUFA, monounsaturated fatty acid; PUFA, polyunsaturated fatty acid; EPA, eicosapentaenoic acid; DHA, docosahexaenoic acid. ORAC, Oxygen Radical Absorbance Capacity.

**Table S2:** Anthropometric and body composition parameters, metabolic and health risk indicators in adolescents stratified with respect to the Mediterranean Diet adherence.

| Characteristics                                              | Adherence to the Mediterranean Diet |              |              | P-value            |
|--------------------------------------------------------------|-------------------------------------|--------------|--------------|--------------------|
|                                                              | Poor                                | Medium       | Optimal      |                    |
| Weight (Kg)                                                  | 64.65±20.10                         | 66.1±12.75   | 63.58±10.70  | *0.96 ¥0.98 §0.69  |
| Height (cm)                                                  | 163.97±8.93                         | 168.20±8.15  | 168.47±8.16  | *0.43 ¥0.39 §0.99  |
| BMI (Kg/m <sup>2</sup> )                                     | 23.63±4.55                          | 23.20±3.36   | 22.33±3.20   | *0.95 ¥0.63 §0.53  |
| Waist (cm)                                                   | 72.93±12.30                         | 73.42±9.14   | 73.08±8.47   | *0.99 ¥0.99 §0.98  |
| Hip (cm)                                                     | 94.43±8.32                          | 96.74±8.67   | 94.90±7.36   | *0.77 ¥0.99 §0.61  |
| Waist/hip ratio                                              | 0.77±0.07                           | 0.76±0.06    | 0.77±0.06    | *0.91 ¥1 §0.74     |
| BCM (%)                                                      | 54.63±3.66                          | 54.13±3.92   | 54.77±3.61   | *0.94 ¥0.99 §0.76  |
| FM (Kg)                                                      | 14.79±7.91                          | 14.89±6.22   | 13.69±6.81   | *0.99 ¥0.92 §0.73  |
| FFM (Kg)                                                     | 49.87±13.94                         | 51.19±9.85   | 50.52±9.10   | *0.94 ¥0.99 §0.96  |
| PhA (°)                                                      | 6.21±0.75                           | 6.45±1.06    | 6.25±0.75    | *0.81 ¥0.99 §0.65  |
| TBW (%)                                                      | 56.74±5.33                          | 57.44±6.56   | 59.10±7.10   | *0.96 ¥0.67 §0.55  |
| <b>General metabolic, health and inflammatory biomarkers</b> |                                     |              |              |                    |
| Glucose (mg/dL)                                              | 80.14±5.73                          | 80.10±7.40   | 79.18±6.35   | *1 ¥0.94 §0.84     |
| Insulin (mU/L)                                               | 11.64±11.97                         | 12.11±7.96   | 9.38±6.51    | *0.99 ¥0.77 §0.31  |
| HOMA-IR                                                      | 2.30±2.41                           | 2.43±1.60    | 1.83±1.26    | *0.98 ¥0.74 §0.24  |
| TG (mg/dL)                                                   | 78.86±71.09                         | 82.49±79.80  | 66.39±29.27  | *0.52 ¥0.88 §0.50  |
| Total Cholesterol (mg/dL)                                    | 143.71±18.43                        | 150.84±29.75 | 152.33±27.41 | *0.81 ¥0.74 §0.97  |
| LDL (mg/dL)                                                  | 75.86±17.68                         | 85.92±22.06  | 87.09±24.55  | *0.54 ¥0.47 §0.97  |
| HDL (mg/dL)                                                  | 50.86±18.13                         | 48.51±8.93   | 51.97±12.55  | *0.87 ¥0.97 §0.43  |
| Creatinine (mg/dL)                                           | 0.92±0.13                           | 0.90±0.12    | 0.88±0.12    | *0.93 ¥0.78 §0.85  |
| Urea nitrogen (mg/dL)                                        | 29.28±4.54                          | 29.05±7.13   | 31.36±5.96   | *0.99 ¥0.72 §0.30  |
| Uric acid (mg/dL)                                            | 4.49±0.83                           | 4.71±1.21    | 4.99±1.46    | *0.91 ¥0.62 §0.64  |
| Total bilirubin (mg/dL)                                      | 1.02±0.44                           | 0.90±0.42    | 1.14±0.70    | *0.86 ¥0.87 §0.18  |
| Direct bilirubin (mg/dL)                                     | 0.29±0.09                           | 0.26±0.09    | 0.28±0.09    | *0.71 ¥ 0.94 §0.72 |
| ESR (mm/h)                                                   | 15.71±5.85                          | 17.51±12.04  | 16.72±10.85  | *0.99 ¥0.96 §0.75  |
| CRP (mg/L)                                                   | 1.25±0.67                           | 1.30±0.83    | 1.08±0.31    | *0.98 ¥0.80 §0.33  |

\* Poor vs Medium. ¥ Poor vs Optimal. § Medium vs Optimal. Statistical differences were evaluated by one-way ANOVA test.
